# Supplementary material for: Enhanced thermal stability, hydrophobicity, UV radiation resistance, and antibacterial properties of wool fabric treated with p-aminobenzenesulphonic acid
Source: Royal Society of Chemistry journal article supplement (doi:10.1039/d0ra02267e), 2020-01-01
Supplement: d0ra02267e1.pdf [file d0ra02267e1.pdf]

Enhanced hydrophobicity, thermal stability, UV radiation  
resistance, and antibacterial properties of wool fabric treated  
with p-aminobenzenesulfonic acid by oxidative  
polymerization

*Mohammad Mahbubul Hassan*

Bioproduct & Fiber Technology Team, AgResearch Limited, 1365 Springs Road, Lincoln  
7647, Canterbury, New Zealand.

## **Electronic Supplementary Information**

### **Contents**

**Fig. S1.** Effect of multiple cycles of washing on the surface resistance of wool fabric treated with ABSA

**Fig. S2.** EDX spectra of untreated wool fabric (a) and also wool fabric samples treated with 1 (b), 2 (c), 3 (d), and 4 % (e) owf pASA

**Fig. S3.** Optical micrographs of water droplets placed on pASA-treated wool fabric at different times

**Table S1.** EDX elemental analysis of untreated and pABSA-treated wool fabrics

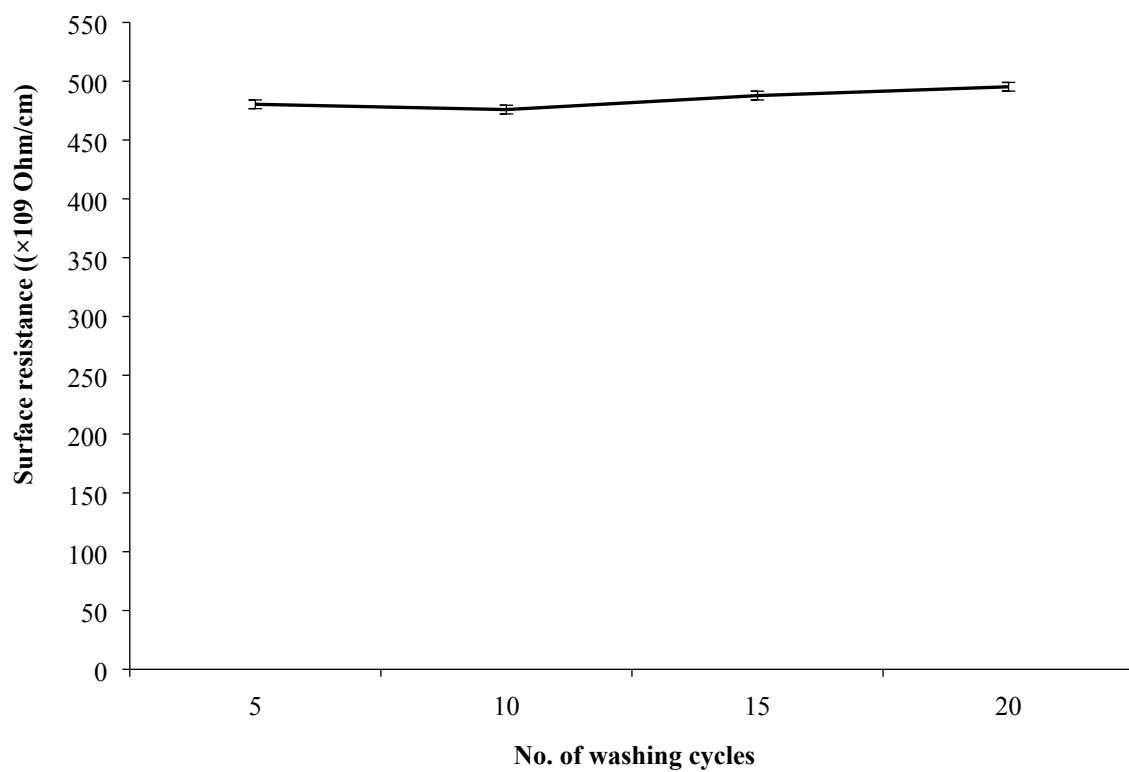

**Fig. S1.** Effect of multiple cycles of washing on the surface resistance of wool fabric treated with ABSA.

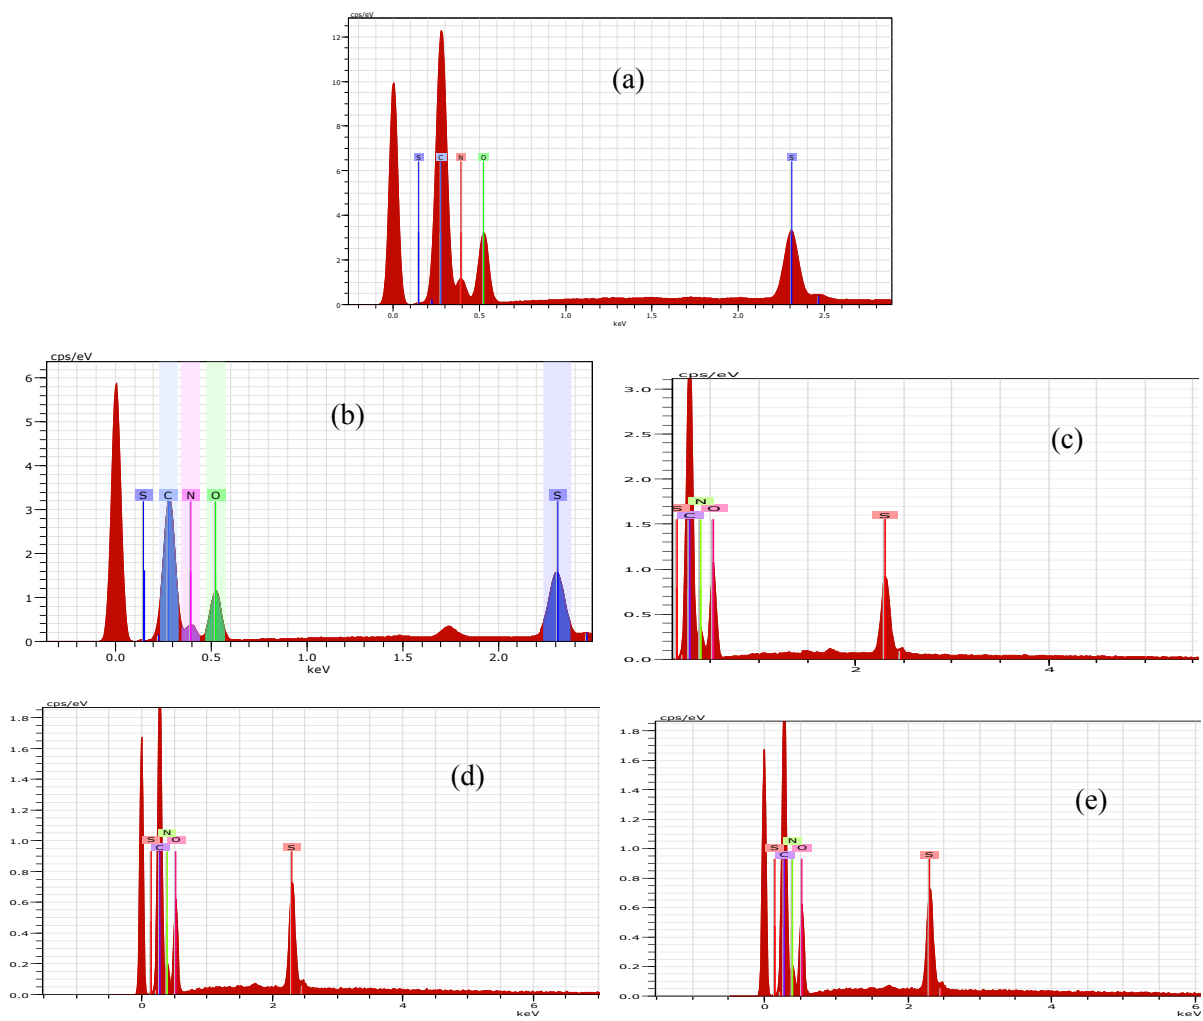

**Fig. S2.** EDX spectra of untreated wool fabric (a) and also wool fabric samples treated with 1 (b), 2 (c), 3 (d), and 4 % (e) owf pASA.

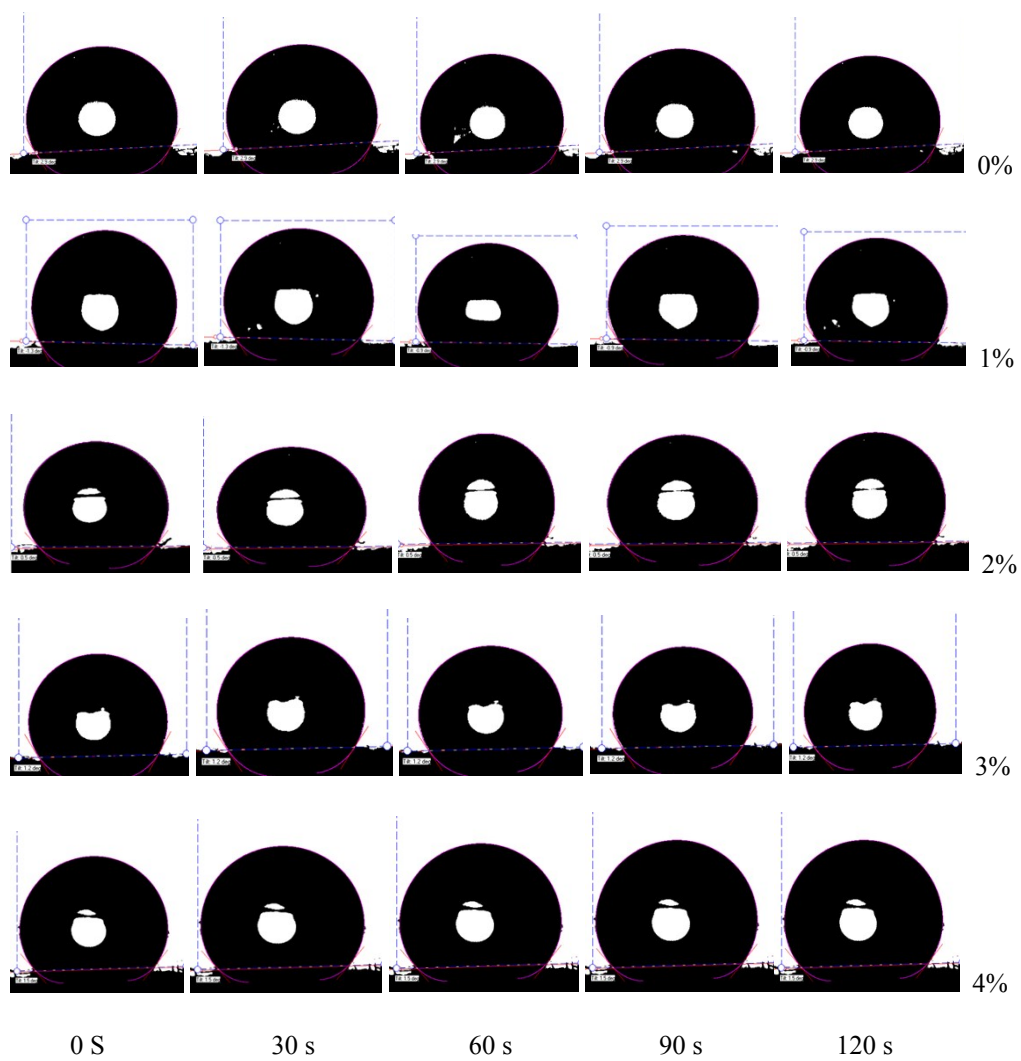

**Fig. S3.** Optical micrographs of water droplets placed on pASA-treated wool fabric at different times.

**Table S1**

EDX elemental analysis of untreated and pABSA-treated wool fabrics

| pABSA concentration (%) | Mass of elements (%) |       |       |      |
|-------------------------|----------------------|-------|-------|------|
|                         | C                    | N     | O     | S    |
| 0                       | 52.68                | 19.79 | 25.92 | 1.61 |
| 1                       | 50.96                | 19.23 | 27.39 | 2.42 |
| 2                       | 49.48                | 19.91 | 27.22 | 3.39 |
| 3                       | 48.87                | 19.84 | 26.98 | 4.31 |
| 4                       | 48.99                | 19.68 | 26.78 | 4.55 |
